# Supplementary material for: Cucurbit[7]uril: an amorphous molecular material for highly selective carbon dioxide uptake
Source: Royal Society of Chemistry journal article supplement (doi:10.1039/c1cc12689j), 2011-01-01
Supplement: c1cc12689j.pdf [file c1cc12689j.pdf]

**Supporting Information for *Chemical Communications***

**Cucurbit[7]uril: an Amorphous Molecular Material for Highly Selective  
Carbon Dioxide Uptake**

**Jian Tian,<sup>a</sup> Shengqian Ma,<sup>b</sup> Praveen K. Thallapally,<sup>\*a</sup> Drew Fowler,<sup>c</sup> B Peter McGrail<sup>a</sup> and Jerry L.  
Atwood<sup>\*c</sup>**

## **Experimental procedures:**

**1. Material synthesis and preparation.** Cucurbit[7]uril and cucurbit[6]uril were synthesized according to the classical procedure reported by Day and Co-workers.<sup>1</sup> CB[7] was precipitated by pouring its hot solution of glycerol into methanol, followed by filtration and washing several times with methanol. The obtained solid was dried under vacuum at 150 °C for 48 hrs to remove included solvent molecules. The purity of CB[7] has been checked by <sup>1</sup>H NMR and mass spectrometry studies which are identical to the reported values. CB[7] solid is harvested in amorphous state which is confirmed by powder X-ray diffraction and selected area electron diffraction (SAED) studies. CB[6] is obtained in a semi-crystalline state and transformed into amorphous state by grinding.

**2. CO<sub>2</sub> sorption isotherms and enthalpy of adsorption for CB[7] solid.** Gas sorption isotherms were acquired from activated samples of CB[7] and CB[6] with an Autosorb-IQ (volumetric method) outfitted with the micropore option by Quantachrome Instruments (Boynton Beach, Florida, USA) running version 1.55 of the ASWin software package. CO<sub>2</sub> isotherms were collected at various temperatures (273 K, 297 K and 196 K) in the range  $1.00 \times 10^{-4} \text{ bar} \leq P \leq 1.00 \text{ bar}$  using bone dry CO<sub>2</sub>. The CO<sub>2</sub> adsorption enthalpy of CB[7] was calculated from the isotherms at 273 K and 297 K using the “heat of sorption” function enclosed in the software. The BET surface area is decided using the isotherm at 196 K.

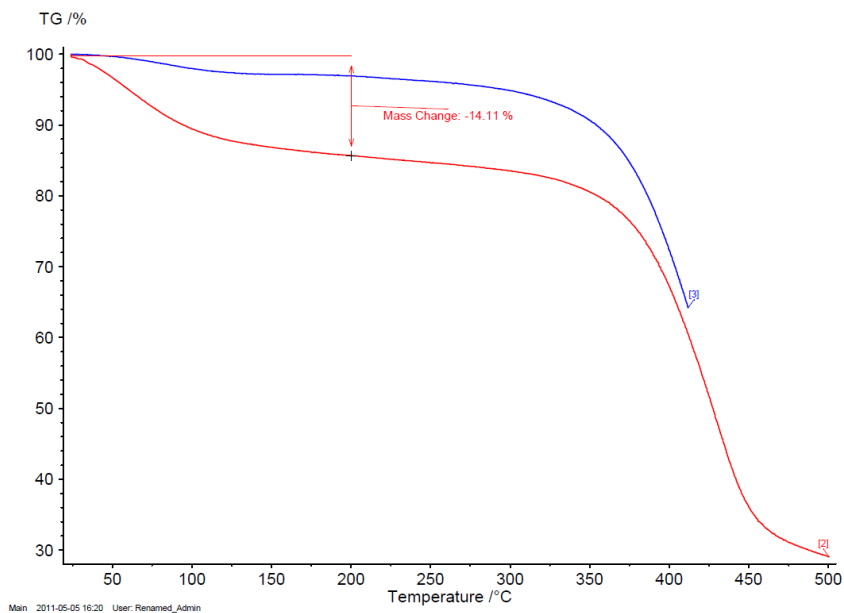

**Figure S1.** TGA profile of freshly synthesized CB[7] solid (red) and activated CB[7] solid after exposure to air for 24 hrs (blue).

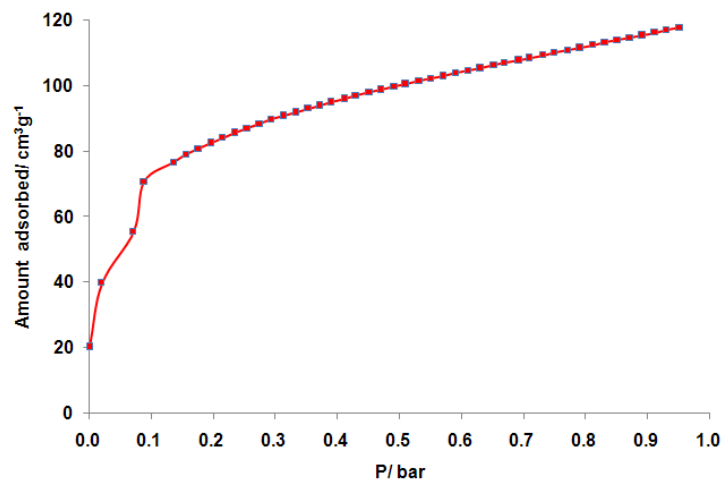

**Figure S2.** The CO<sub>2</sub> sorption isotherm of CB[7] solid at 196 K.

BET Surface Area Report  
BET Surface Area:  $293.3418 \pm 3.0144 \text{ m}^2/\text{g}$   
Slope:  $0.015688 \pm 0.000157 \text{ g}/\text{cm}^3\text{STP}$   
Y-Intercept:  $-0.000116 \pm 0.000031 \text{ g}/\text{cm}^3\text{STP}$   
C:  $-134.692837$   
Qm:  $64.2143 \text{ cm}^3/\text{g STP}$   
Correlation Coefficient:  $0.9998498$   
Molecular Cross-Sectional Area:  $0.1700 \text{ nm}^2$

| Relative Pressure(P/Po) | Quantity Adsorbed(cm <sup>3</sup> /g STP) | 1/[Q(Po/P - 1)] |
|-------------------------|-------------------------------------------|-----------------|
| 0.156436232             | 79.0150                                   | 0.002347        |
| 0.175717463             | 80.8105                                   | 0.002638        |
| 0.196007035             | 82.6524                                   | 0.002950        |
| 0.214187911             | 84.1210                                   | 0.003240        |
| 0.234287276             | 85.7287                                   | 0.003569        |

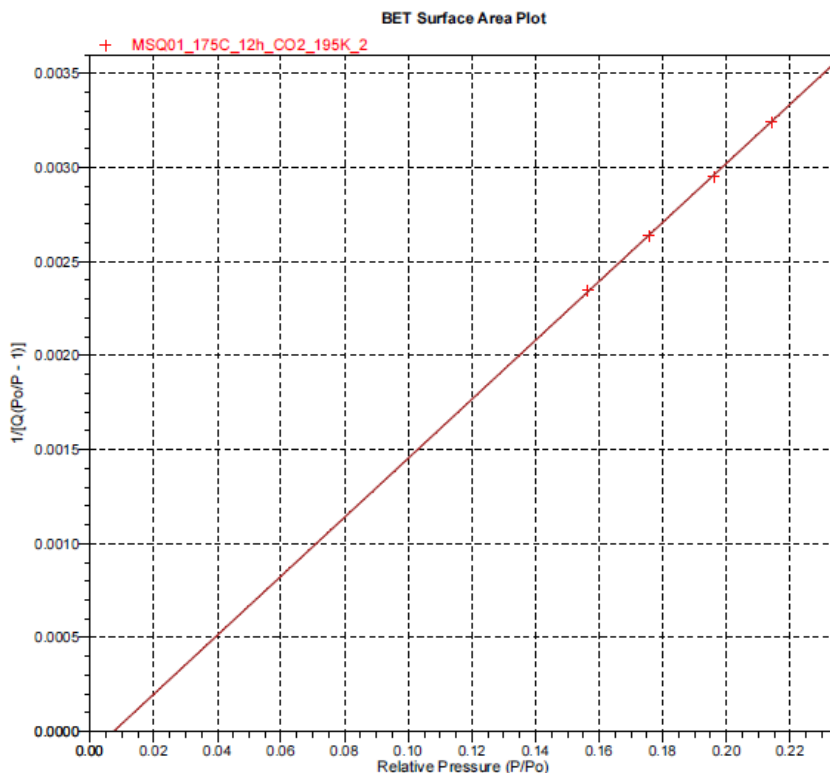

**Figure S3.** The measurement of multi-point surface area of CB[7] was based on sorption profile at  $P/P^0 = 0.15-0.25$ .

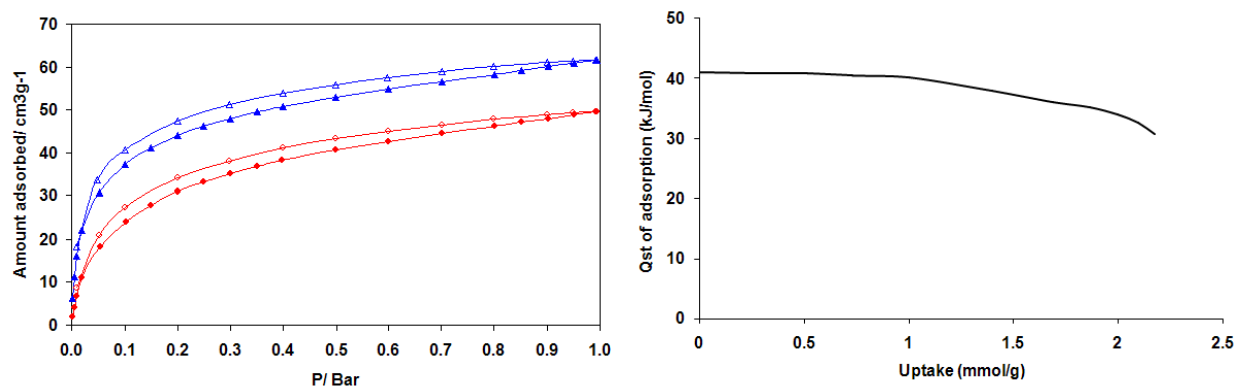

**Figure S4.** (left) CO<sub>2</sub> sorption isotherms of CB[7] solid at 297 K (red circle) and 273 K (blue triangle). (right) The CO<sub>2</sub> adsorption enthalpy of CB[7] calculated from the isotherms at 273 K and 297 K using the “heat of adsorption” function enclosed in the software.

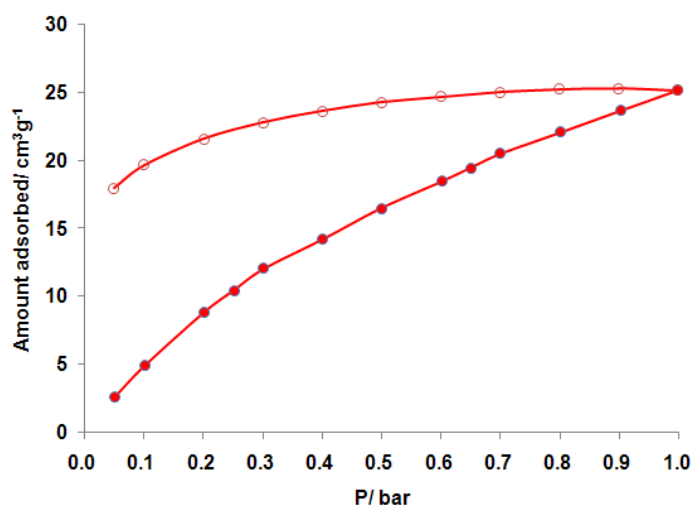

**Figure S5.** The CO<sub>2</sub> sorption isotherm of amorphous CB[6] solid at 297 K. (filled symbols: adsorption; open symbols: desorption).

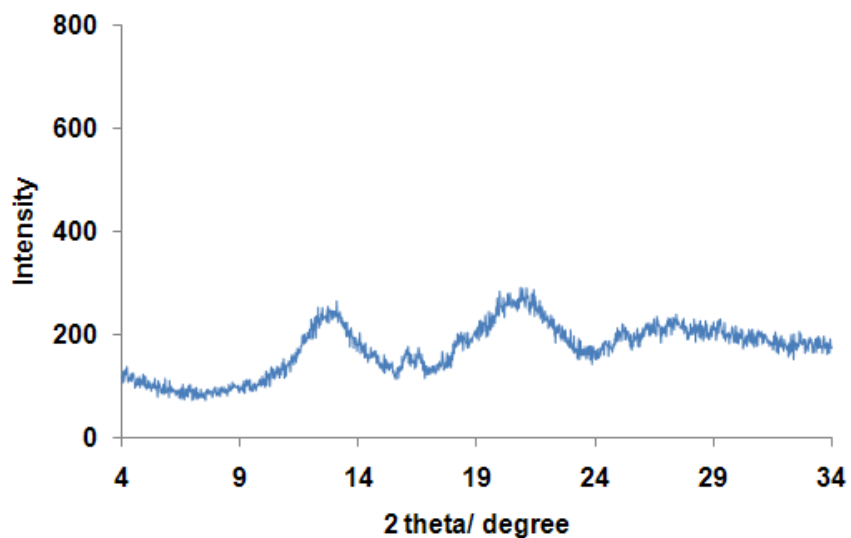

**Figure S6.** The PXRD pattern of activated CB[7] solid shows two broad peaks.

**Table S1. CO<sub>2</sub> uptake and enthalpy of adsorption for selected MOFs and organic molecular solids.**

| Material                      | BET surface area<br>[m <sup>2</sup> g <sup>-1</sup> ] | V <sub>p</sub> [cm <sup>3</sup> g <sup>-1</sup> ] | V(CO <sub>2</sub> ) [mg/g], RT<br>0.1 bar | V(CO <sub>2</sub> )<br>[mg/g], RT<br>1 bar | -ΔH <sub>ads</sub><br>(kJ/mol) |
|-------------------------------|-------------------------------------------------------|---------------------------------------------------|-------------------------------------------|--------------------------------------------|--------------------------------|
| CB[7]                         | 293                                                   | 0.21                                              | 48.0                                      | 100                                        | 40                             |
| CB[6](Hexagonal) <sup>2</sup> | 210                                                   | 0.13                                              | 32.0                                      | 90                                         | 33                             |
| CC3 <sup>3</sup>              | 624                                                   |                                                   | 30.0*                                     | 100*                                       |                                |
| TPP <sup>4</sup>              | 240                                                   |                                                   | 13                                        | 43                                         |                                |
| SOF-1a <sup>5</sup>           | 474                                                   | 0.23                                              | 10.0                                      | 32                                         | 27.5                           |
| MOF-5 <sup>6</sup>            | 3563                                                  | 1.319                                             | 3.5                                       | 36.5                                       | 15.9                           |
| HKUST-1 <sup>6</sup>          | 2134                                                  | 0.801                                             | 27.3                                      | 123.5                                      | 23.3                           |
| Mg-DOBDC <sup>6</sup>         | 1495                                                  |                                                   | 261.6                                     | 352                                        | 47                             |

**Reference:**

1. A. Day, A. P. Arnold, R. J. Blanch and B. Snushall, *J. Org. Chem.*, 2001, **66**, 8094.
  2. H. Kim, Y. Kim, M. Yoon, S. Lim, S. M. Park, G. Seo and K. Kim, *J. Am. Chem. Soc.*, 2010, **132**, 12200.
  3. T. Tozawa, *Nat. Mater.*, 2009, **8**, 973.
  4. P. Sozzani, S. Bracco, A. Comotti, L. Ferretti and R. Simonutti, *Angew. Chem., Int. Ed.*, 2005, **44**, 1816.
  5. W. Yang, A. Greenaway and X. Lin, *et. al*, *J. Am. Chem. Soc.*, 2010, **132**, 14457.
  6. A. Yazaydin, R. Q. Snurr, and T.-H. Park, et al, *J. Am. Chem. Soc.*, 2009, **131**, 18198.
- \* At 273 K.
